# Supplementary material for: Adapting population health interventions for new contexts: qualitative interviews understanding the experiences, practices and challenges of researchers, funders and journal editors
Source: PubMed Central journal article supplement (PMC9615984; doi:10.1136/bmjopen-2022-066451), 2022-10-26
Supplement: bmjopen-2022-066451.draft_revisions.pdf [file bmjopen-2022-066451.draft_revisions.pdf]

# BMJ Open

## Adapting population health interventions for new contexts: Qualitative interviews understanding the experiences, practices and challenges of researchers, funders and journal editors

|                               |                                                                                                                                                                                                                                                                                                                                                                                                                                                                                                                                                                                                                                                                                                                                                                                                                                                                                                                                                                                                                                                                                                                                                                                                                                                                                                                                                                              |
|-------------------------------|------------------------------------------------------------------------------------------------------------------------------------------------------------------------------------------------------------------------------------------------------------------------------------------------------------------------------------------------------------------------------------------------------------------------------------------------------------------------------------------------------------------------------------------------------------------------------------------------------------------------------------------------------------------------------------------------------------------------------------------------------------------------------------------------------------------------------------------------------------------------------------------------------------------------------------------------------------------------------------------------------------------------------------------------------------------------------------------------------------------------------------------------------------------------------------------------------------------------------------------------------------------------------------------------------------------------------------------------------------------------------|
| Journal:                      | <i>BMJ Open</i>                                                                                                                                                                                                                                                                                                                                                                                                                                                                                                                                                                                                                                                                                                                                                                                                                                                                                                                                                                                                                                                                                                                                                                                                                                                                                                                                                              |
| Manuscript ID                 | bmjopen-2022-066451                                                                                                                                                                                                                                                                                                                                                                                                                                                                                                                                                                                                                                                                                                                                                                                                                                                                                                                                                                                                                                                                                                                                                                                                                                                                                                                                                          |
| Article Type:                 | Original research                                                                                                                                                                                                                                                                                                                                                                                                                                                                                                                                                                                                                                                                                                                                                                                                                                                                                                                                                                                                                                                                                                                                                                                                                                                                                                                                                            |
| Date Submitted by the Author: | 07-Jul-2022                                                                                                                                                                                                                                                                                                                                                                                                                                                                                                                                                                                                                                                                                                                                                                                                                                                                                                                                                                                                                                                                                                                                                                                                                                                                                                                                                                  |
| Complete List of Authors:     | <p>Copeland, Lauren; Cardiff University, Centre for Development, Evaluation, Complexity and Implementation in Public Health improvement (DECIPHer)</p> <p>Littlecott, Hannah; Cardiff University, Centre for Development, Evaluation, Complexity and Implementation in Public Health improvement (DECIPHer); LMU, Pettenkofer School of Public Health (PSPH), Institute for Medical Information Processing, Biometry and Epidemiology</p> <p>Couturiaux, Danielle; Cardiff University, Centre for Development, Evaluation, Complexity and Implementation in Public Health improvement (DECIPHer)</p> <p>Hoddinott, Pat; University of Stirling, Nursing, Midwifery and Allied Health Professional Research Unit</p> <p>Segrott, Jeremy; Cardiff University, Centre for Trials Research; Cardiff University, Development, Evaluation, Complexity and Implementation in Public Health improvement (DECIPHer)</p> <p>Murphy, Simon; Cardiff University, Centre for Development, Evaluation, Complexity and Implementation in Public Health improvement (DECIPHer)</p> <p>Moore, Graham; Cardiff University, Centre for Development, Evaluation, Complexity and Implementation in Public Health improvement (DECIPHer)</p> <p>Evans, Rhiannon; Cardiff University, Centre for Development, Evaluation, Complexity and Implementation in Public Health improvement (DECIPHer)</p> |
| Keywords:                     | Public health < INFECTIOUS DISEASES, PUBLIC HEALTH, QUALITATIVE RESEARCH                                                                                                                                                                                                                                                                                                                                                                                                                                                                                                                                                                                                                                                                                                                                                                                                                                                                                                                                                                                                                                                                                                                                                                                                                                                                                                     |
|                               |                                                                                                                                                                                                                                                                                                                                                                                                                                                                                                                                                                                                                                                                                                                                                                                                                                                                                                                                                                                                                                                                                                                                                                                                                                                                                                                                                                              |

SCHOLARONE™  
Manuscripts

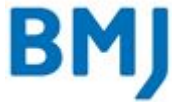

I, the Submitting Author has the right to grant and does grant on behalf of all authors of the Work (as defined in the below author licence), an exclusive licence and/or a non-exclusive licence for contributions from authors who are: i) UK Crown employees; ii) where BMJ has agreed a CC-BY licence shall apply, and/or iii) in accordance with the terms applicable for US Federal Government officers or employees acting as part of their official duties; on a worldwide, perpetual, irrevocable, royalty-free basis to BMJ Publishing Group Ltd ("BMJ") its licensees and where the relevant Journal is co-owned by BMJ to the co-owners of the Journal, to publish the Work in this journal and any other BMJ products and to exploit all rights, as set out in our [licence](#).

The Submitting Author accepts and understands that any supply made under these terms is made by BMJ to the Submitting Author unless you are acting as an employee on behalf of your employer or a postgraduate student of an affiliated institution which is paying any applicable article publishing charge ("APC") for Open Access articles. Where the Submitting Author wishes to make the Work available on an Open Access basis (and intends to pay the relevant APC), the terms of reuse of such Open Access shall be governed by a Creative Commons licence – details of these licences and which [Creative Commons](#) licence will apply to this Work are set out in our licence referred to above.

Other than as permitted in any relevant BMJ Author's Self Archiving Policies, I confirm this Work has not been accepted for publication elsewhere, is not being considered for publication elsewhere and does not duplicate material already published. I confirm all authors consent to publication of this Work and authorise the granting of this licence.

1  
2  
3 **1 Adapting population health interventions for new contexts: Qualitative interviews understanding the**  
4 **2 experiences, practices and challenges of researchers, funders and journal editors**  
5  
6  
7  
8

9 5 Lauren Copeland<sup>1</sup>, Hannah Littlecott<sup>1,2</sup>, Danielle Couturiaux<sup>1</sup>, Pat Hoddinott<sup>3</sup>, Jeremy Segrott<sup>4</sup>, Simon Murphy<sup>1</sup>,  
10 6 Graham Moore<sup>1</sup>, Rhiannon Evans<sup>1</sup>  
11  
12

13 8 1 Centre for Development, Evaluation, Complexity and Implementation in Public Health improvement  
14 9 (DECIPHer), School of Social Sciences, Cardiff University, Wales, UK  
15

16 10 <sup>2</sup> Pettenkofer School of Public Health (PSPH), Institute for Medical Information Processing, Biometry  
17 11 and Epidemiology (IBE), LMU Munich, Elisabeth-Winterhalter-Weg 6, 81377, Munich, Germany  
18

19 12 <sup>3</sup> Nursing Midwifery and Allied Health Professions Research Unit, University of Stirling, Scotland, UK  
20

21 13 <sup>4</sup> Centre for Development, Evaluation, Complexity and Implementation in Public Health improvement  
22 14 (DECIPHer), Centre for Trials Research, Cardiff University, Wales, UK  
23  
24

25 16 **Corresponding author:** Dr Lauren Copeland ([copelandlc@cardiff.ac.uk](mailto:copelandlc@cardiff.ac.uk)).  
26  
27  
28

29 19 Word count: 5588  
30  
31  
32  
33

34 22 **Acknowledgments**  
35  
36

37 24 We thank the ADAPT Study management team which in addition to co-authors included Dr Mhairi Campbell,  
38 25 Prof Peter Craig, Dr Ani Movsisyan, Prof Alicia O’Cathain, Dr Lisa Pfadenhauer, Dr Eva Rehfuess, Dr Britt  
39 26 Hallingberg, Dr Laura Arnold, and Prof Laurence Moore. also thank our advisory group which included Prof  
40 27 Penelope Hawe, Prof Frank Kee, Dr Andrew Booth, Prof Frances Gardner and Dr Julie Bishop. We also thank  
41 28 anonymous members of our qualitative interviewees.  
42  
43  
44

45 30 **Key Words: Adaptation, Public health, Practical challenges, Guidance**  
46  
47  
48  
49  
50  
51  
52  
53  
54  
55  
56  
57  
58  
59  
60

1  
2  
3 41  
4 42  
5 43  
6 44  
7 45  
8 46  
9 47  
10 48  
11 49  
12 50  
13 51  
14 52  
15 53  
16 54  
17 55  
18 56  
19 57  
20 58  
21 59  
22 60  
23 61  
24 62  
25 63  
26 64  
27 65  
28 66  
29 67  
30 68  
31 69  
32 70  
33 71  
34 72  
35 73  
36 74  
37 75  
38 76  
39 77  
40 78  
41 79

## ABSTRACT

**OBJECTIVES:** Research on the adaptation of population health interventions' for implementation in new contexts is rapidly expanding. This has been accompanied by a recent increase in the number of frameworks and guidance to support adaptation processes. Nevertheless, there remains limited exploration of the real-world experiences of undertaking intervention adaptation, notably the challenges encountered by different groups of stakeholders, and how these are managed. Understanding experiences is imperative in ensuring that guidance to support adaptation has practical utility. This qualitative study examines researcher and stakeholder experiences of funding, conducting and reporting adaptation research.

**SETTING:** Adaptation studies.

**PARTICIPANTS:** Participants/cases were purposefully sampled based to represent a range of adapted interventions, types of evaluations, expertise, and countries. Semi-structured interviews were conducted with a sample of researchers (n=23); representatives from research funding panels (n=6); journal editors (n=5) and practitioners (n=3).

**MEASURES:** A case study research design was used. Data were analysed using the Framework approach. Overarching themes were discussed within the study team, with further iterative refinement of sub-themes.

**RESULTS:** The results generated four central themes. The first three relate to the experience of intervention adaptation 1) involving stakeholders throughout the adaptation process and how to integrate the evidence base with experience; 2) selecting the intervention and negotiating the mismatch between the original and the new context; and 3) the complexity and uncertainty when deciding the re-evaluation process. The final theme (4) reflects on participants' experiences of using adaptation frameworks in practice, considering recommendations for future guidance development and refinement.

**CONCLUSION:** This study highlights the range of complexities and challenges experienced in funding, conducting and reporting research on intervention adaptation. Moving forward, guidance can be helpful in systematising processes, provided that it remains responsive to local contexts and encourage innovative practice.

### • **Strengths and limitations of this study**

- The methodology captured a diverse and nuanced range of perspectives in relation to intervention adaptation.
- The sampling ensured that we captured a wide range of studies including micro, meso and macro level interventions which allowed us to explore adaptation research experiences.
- The primary limitation of this study was that we were unable to recruit Patient and Public Involvement (PPI) and policy makers, limiting diversity in the perspectives reflected in our data

- 1  
2  
3 80 • Without the input from policymakers and PPI the study lacks insight into how intervention adaptation  
4 81 is commissioned and resourced at a national and local level and how adaptation is understood by PPI  
5 82 contributors.  
6  
7  
8 83  
9 84  
10  
11  
12  
13  
14  
15  
16  
17  
18  
19  
20  
21  
22  
23  
24  
25  
26  
27  
28  
29  
30  
31  
32  
33  
34  
35  
36  
37  
38  
39  
40  
41  
42  
43  
44  
45  
46  
47  
48  
49  
50  
51  
52  
53  
54  
55  
56  
57  
58  
59  
60

For peer review only

## 1.0 Background

Research on the adaptation of population health interventions' for implementation in new contexts is evolving at speed<sup>1-7</sup>. Adaptation is when intentional changes are made to an evidence informed intervention, either pro-actively or in response to emerging challenges, in order to improve the contextual fit within a new setting. This evolution accompanies the increased recognition that intervention effects do not always directly transfer to new contexts<sup>4 5 8-10</sup> and that adapting an existing intervention may be more efficient than de novo intervention development<sup>11</sup>. Within the ADAPT study population health interventions are defined as interventions or policies in public health or health services that aim to change the population distribution of risk at either the micro, meso or macro level<sup>12</sup>.

In response to the emerging research on adaptation there has been a significant increase in frameworks and guidance to support these processes<sup>1 2 13-15</sup>. While a number of these frameworks are explicitly grounded in empirical examples of adaptations, they often provide limited, exploration of the real world practice of undertaking adaptation, notably the complexity and challenges encountered by a diverse range of stakeholder groups<sup>16</sup>. Equally, stakeholder involvement and co-production has been increasingly recognised as imperative in the complex process of development, adaptation and evaluation of interventions<sup>14 17 18</sup>. This, however, is something that has been underexamined in relation to adaptation. Furthermore, there has been limited research exploring the uptake and usefulness of guidance and frameworks to support adaptation which is important given that it seems to be rarely used. Publication of existing guidance has been relatively recent, which may explain the limited reports of guidance use and impact. It is important to consider how frameworks have been, and might be, integrated into real world practice to maximise their impact<sup>19</sup>.

This qualitative study examines stakeholders' experiences of funding, conducting and reporting of adaptation of complex interventions. It aims to understand the complexities and the practical challenges of conducting adaptation research. It was undertaken concurrently with other work packages as part of the ADAPT study (2018-2020), which aimed to develop evidence and consensus-informed guidance<sup>12</sup> that was grounded in the theoretical, methodological and real-world understandings, experiences, and perspectives of a diverse range of relevant stakeholders.

### 1.1 The ADAPT Study

The ADAPT study (2018-2020) was funded by the UK MRC-NIHR methods panel to develop population health interventions' adaptation guidance<sup>7</sup>. It aims to support researchers, policy-makers, practitioners, funders and journal editors in the funding, conduct and reporting of research on adaptation. The ADAPT study comprised of three work packages: 1) A systematic review of existing adaptation guidance<sup>2</sup> and scoping review of case examples of intervention adaptation<sup>20</sup>; 2) A qualitative study using semi-structured interviews to explore the understandings, perspectives and experiences of researchers, funders, journal editors, and policy and practice stakeholders; and 3) A Delphi expertise consensus exercise to scope the clarity of the definitions and constructs used in the guidance, explore and capture key debates, identify agreement on important adaptation processes, and ascertain areas where there is limited consensus<sup>21</sup>. These work packages formed part of the process to develop the guidance and the current study forms part of work package 2.

1  
2  
3 1254  
5 126 **2.0 Methods**

7 127 This paper reports on the semi-structured interviews which were undertaken between April and September 2019  
8 128 concurrently to inform the ADAPT study guidance. Participants were stakeholders with experience of  
9 129 intervention adaptation. Ethical approval was provided by Cardiff University's School of Social Sciences Ethics  
11 130 Committee (Ref: SREC/3165).

13 131 A case study research design was used in the first instance<sup>22-24</sup>. A case of adaptation was defined as a  
14 132 population health intervention that had previously been subjected to adaptation or was currently being adapted.  
16 133 For each of the cases, we aimed to interview a researcher involved in intervention adaptation and/or re-  
17 134 evaluation, Patient and Public Involvement (PPI) contributors who were part of the intervention adaptation and  
19 135 where possible an associated decision-makers (e.g. policy and/or practitioner stakeholder) who may have had  
20 136 experience of implementing the intervention in the new context. Although, in many cases, there was only one  
22 137 perspective represented per case. Funders and journal editors were not linked to specific cases but contributed to  
23 138 understanding of the wider evaluation context. As the study unfolded it became increasingly challenging to  
24 139 recruit multiple and varied participants per case. Therefore, in many cases, there was only one perspective  
26 140 represented per case. In order to redress this shortcoming, more emphasis was placed on exploring diverse  
27 141 perspectives across different participants linked to different adapted interventions rather than comparing across  
29 142 cases.

31 143 **2.1 Recruitment and sampling**

33 144 Researchers, policy-makers and practitioners were initially identified through case examples of adapted  
34 145 interventions retrieved as part of the ADAPT systematic review<sup>2</sup> and scoping review<sup>20</sup>. The studies were  
36 146 included if they were a primary study describing an adaptation process and/or an evaluation of an evidence-  
37 147 informed intervention adapted to a new context, focused on public health and/or health service interventions,  
38 148 and were published from 2000 onwards. Studies were excluded if the intervention had been designed de novo  
40 149 for a specific context or examined clinical procedures, such as surgery. The 312 retrieved interventions were  
41 150 classified according to: the socio-ecological domain where the theory of change primarily operated (micro, meso  
43 151 or macro); the contexts between which the intervention was transferred (e.g. country to country or population to  
44 152 population within a country); study design (e.g. effectiveness or feasibility); and outcomes (i.e., favourable or  
46 153 unfavourable). The purpose of this was to achieve insight into variations in the nature of system disruptions  
47 154 (areas the intervention intends to target and enact change upon), adaptations and adaptations processes and how  
48 155 they might explain different outcomes. During the recruitment process participants were emailed the  
50 156 information sheet and the consent form and asked to provide consent to take part in the study prior to the  
51 157 interview. All participants were given at least a week to consider their participation prior to their completion of  
53 158 the consent form.

54  
55 159

57 160 All 23 primary researchers, who were recruited, were contacted, with the aim to snowball sample further  
58 161 stakeholders. This was largely ineffectual, this yielded 3 participants due to the age of some of the studies,  
59 162 therefore, additional recruitment strategies were used: expertise recommendation; advertising through the

1  
2  
3 163 Involving People charity, which supports public and patient involvement in research; and Twitter promotion  
4 164 targeting the European Society for Prevention Research and the Society for Prevention Research. Funders were  
5 165 identified from international funding boards. Journal editors were identified from the relevant journals that  
6 166 published the case examples of adapted interventions.

9 167  
10  
11 168 A total of 37 participants were recruited to the study. The sample comprised of 23 researchers involved in the  
12 169 adaptation of 23 interventions (cases) (Table 1). The researcher participants conducted their work in the United  
13 170 States of America (US) (n=12), United Kingdom (UK) (n=2), New Zealand (n=2), India (n=1), France(n=1),  
14 171 Germany(n=1), Spain(n=1), Italy(n=1), China (n=1), German (n=1). Of the three practitioners, one practitioner  
15 172 was linked to one of the 23 interventions and two were recruited via expert recommendation. These practitioners  
16 173 had experience of adapting interventions for addictions b these interventions were not one of the 23  
17 174 interventions included. Two of the practitioners conducted their work within the UK and one conducted their  
18 175 work in France. The study did not succeed in recruiting PPI representatives or policymakers. Six representatives  
19 176 from funding panels participated. They were based in the USA (n=1), UK (n=3), Germany (n=1), or had an  
20 177 international remit (n=1). The 5 journal editors represented global health (2) or public health (3). Their primary  
21 178 publishing location was US (2), Canada (1), countries across Europe (1) and Australia (1). Amongst the  
22 179 approached individuals that did not take part, invitees stated that the subject matter was not relevant to them (6),  
23 180 their workload was too high, (2) or they did not respond after 3 follow-up contacts (64).

## 30 181 **2.2 Data collection**

31  
32 182 Interviews were conducted by two members of the research team (LC/HL). Tailored topic guides were  
33 183 developed for each set of researchers and stakeholders, informed by the study research questions and emerging  
34 184 data from the systematic<sup>2</sup> and scoping reviews<sup>20</sup>. Guides were refined and confirmed with the wider study team  
35 185 prior to data collection. They were also reviewed as the interview progressed and no revisions were necessary.  
36 186 They considered: the definition of intervention adaptation and related concepts; experiences of undertaking  
37 187 adaptation and re-evaluation, in addition to funding and reporting adaptation processes; and views on adaptation  
38 188 guidance development (see appendix A). Interview length ranged from 40 to 75 minutes and were conducted via  
39 189 telephone or Skype. Interviews were audio-recorded and transcribed verbatim by a professional transcription  
40 190 company. Transcripts were reviewed for accuracy and anonymised.

## 45 191 **2.3 Data analysis**

46  
47 192 Four members of the research team (LC; DC; HL; RE) analysed the data using the Framework approach<sup>25</sup>. The  
48 193 three participant data sets (researchers and practitioners; funders; journal editors) were treated separately. Three  
49 194 different coding frameworks were then developed by the four researchers, using two interviews from each data  
50 195 set which were randomly chosen. Each framework included both a priori codes and in vivo codes. The  
51 196 remaining data were coded by a single researcher. The frameworks evolved during analysis, with the new codes  
52 197 discussed and confirmed by the team, before being applied to previously coded data. To ensure reliability, 10%  
53 198 of the data was independently checked by a second researcher (RE/ DC). Disagreements between researchers  
54 199 were resolved through discussion. NVivo 10 supported data analysis and storage.



1  
2  
3 200 The four researchers charted coded data into the three separate framework matrixes. Data within and across the  
4 201 matrixes were compared and contrasted by two members of the research team (LC; RE) as part of the  
5  
6 202 interpretative process of generating themes. To aid this process, visual maps were created. We created five over-  
7  
8 203 overarching themes, each with a set of related subthemes: adaptation decision-making and processes, re-evaluation  
9  
10 204 decision-making and processes; funding; publication; and recommendations for adaptation guidance.  
11  
12 205 Overarching themes were presented to the wider ADAPT study team who suggested further refinements of  
13  
14 206 subthemes. As the ADAPT Delphi consensus exercise progressed and areas of consensus and disagreement  
15  
16 207 emerged, we undertook additional analysis of the qualitative data to bring insight to these emerging  
17  
18 208 perspectives.

209

## 210 **2.4 Patient and public involvement**

211 This research was conducted without patient involvement. We involved policy and practice representatives with  
212 experience of intervention adaptation in qualitative interviews and our study advisory group.

213

214

## 215 **2.5 Reflexivity**

216 LC and HL conducted the interviews and LC, HL, DC and RE conducted the data analysis. At the time of analysis,  
217 LC and HL were Research Associates with PhDs. DC was a Research Assistant with an MSc. RE was a Senior  
218 Lecturer with a PhD. All are experienced qualitative researchers who have received training in conducting  
219 interviews and thematic and framework analysis. None of the researchers apart from RE and HL had a prior  
220 relationship before the study. RE and HL had worked previously on studies together. The participants did not  
221 know the researchers prior to the study. The participants understood the researchers were conducting the  
222 interviews as part of the ADAPT study in order to explore their experiences of conducting adaptation studies. RE  
223 and HL have a methodological expertise in adaptation which may have influenced their interview style and  
224 analysis of the data based on their extensive prior knowledge of the area. LC and DC were new to adaptation, but  
225 both have worked on process evaluations looking at context. Therefore, their focus on context may have  
226 influenced the interview style and analysis. The interviews were guided by topic guides developed by the wider  
227 team which will have negated some of the researcher bias. Ten percent of the analysis was double coded to negate  
228 some of the bias of the researchers.

229 Table 1: Adaptation Cases Sample Characteristics

230

| Stage of Study                                          | Participant (researcher/practitioner) | Type of Intervention (macro/meso/micro) | Research Design (feasibility study or randomised control trial (RCT)) | Target of Intervention             | Contextual Transfer (country to country/ population to population/ setting to setting) | Evaluation Outcome |
|---------------------------------------------------------|---------------------------------------|-----------------------------------------|-----------------------------------------------------------------------|------------------------------------|----------------------------------------------------------------------------------------|--------------------|
| <b>Adaptation cases with 2 stakeholder perspectives</b> |                                       |                                         |                                                                       |                                    |                                                                                        |                    |
| Completed                                               | Researcher and Practitioner           | Meso                                    | Feasibility                                                           | Diet and exercise                  | Policy to different settings                                                           | Infeasible         |
| <b>Adaptation cases with 1 stakeholder perspective</b>  |                                       |                                         |                                                                       |                                    |                                                                                        |                    |
| Completed                                               | Researcher                            | Macro                                   | Feasibility                                                           | Reproductive and child health      | Country to country                                                                     | Feasible           |
| Completed                                               | Researcher                            | Macro                                   | Feasibility                                                           | Road traffic injury                | Country to country                                                                     | Feasible           |
| Completed                                               | Researcher                            | Meso                                    | RCT                                                                   | Addictions                         | Country to country                                                                     | Effective          |
| Completed                                               | Researcher                            | Meso                                    | Feasibility                                                           | Sexual health                      | Population to population                                                               | Feasible           |
| Completed                                               | Researcher                            | Meso                                    | Feasibility                                                           | Sexual health                      | Population to population                                                               | Effective          |
| Completed                                               | Researcher                            | Meso                                    | Feasibility                                                           | Hearing                            | Setting to setting                                                                     | Feasible           |
| Completed                                               | Researcher                            | Micro                                   | RCT                                                                   | Parenting                          | Country to country                                                                     | Effective          |
| Completed                                               | Researcher                            | Micro                                   | RCT                                                                   | Weight Loss                        | Population to population                                                               | Effective          |
| Completed                                               | Researcher                            | Micro                                   | Feasibility                                                           | Diabetes prevention and management | Population to population                                                               | Feasible           |
| Completed                                               | Researcher                            | Micro                                   | Feasibility                                                           | Smoking: cessation                 | Population to population                                                               | Feasible           |
| Completed                                               | Researcher                            | Micro                                   | Feasibility                                                           | Mental health                      | Country to country                                                                     | Feasible           |
| Completed                                               | Researcher                            | Micro                                   | Feasibility                                                           | Childhood obesity                  | Setting to setting                                                                     | Feasible           |

|             |              |       |                     |                                    |                          |            |
|-------------|--------------|-------|---------------------|------------------------------------|--------------------------|------------|
| Completed   | Researcher   | Micro | Feasibility         | Exercise                           | Population to population | Infeasible |
| Completed   | Practitioner | Micro | Feasibility and RCT | Addictions                         | Setting to setting       | Mixed      |
| Completed   | Practitioner | Micro | Feasibility and RCT | Addictions                         | Setting to setting       | Mixed      |
| In progress | Researcher   | Meso  | RCT                 | Lung health                        | Country to country       | N/A        |
| In progress | Researcher   | Meso  | RCT                 | Cancer                             | Population to population | N/A        |
| In progress | Researcher   | Meso  | Feasibility         | Weight loss                        | Country to country       | N/A        |
| In progress | Researcher   | Micro | RCT                 | Diabetes prevention and management | Population to population | N/A        |
| In progress | Researcher   | Micro | RCT                 | Diabetes prevention and management | Population to population | N/A        |
| In progress | Researcher   | Micro | RCT                 | Diabetes prevention and management | Population to population | N/A        |
| In progress | Researcher   | Micro | Feasibility         | Weight loss                        | Country to country       | N/A        |
| In progress | Researcher   | Micro | Feasibility and RCT | Diet and exercise                  | Country to country       | N/A        |

### 3.0 Results

The analysis generated four central themes. The first three relate to participants' experiences of and reflections on intervention adaptation 1) experience of involving stakeholders in the adaptation process; 2) negotiating the mismatch between the original context where the intervention was delivered and the new context; 3) deciding upon the re-evaluation process. The final theme (4) reflects on participants' experiences of using adaptation frameworks, and their recommendations for future guidance development.

#### 3.1 Involving stakeholders

Participants foregrounded the importance of involving a diverse range of stakeholders (intervention developer, industry policy makers, implementers and organisations supporting delivery, and participants) throughout the adaptation process. The reasons for stakeholders' engagement were primarily related to them having more knowledge of how the intervention functions or the characteristics of the new context, compared to those leading the process, who were often academics.

*"Absolutely I mean Apple doesn't develop an iPhone without doing market research. We, as researchers and clinicians and doctors, you know, we have the knowledge from the textbook and from the theory and everything we've learnt, but we don't understand how to apply to a specific population without their knowledge and their expertise to teach us how it would be relevant for them." P008 researcher micro in progress*

Stakeholder involvement was considered to be so imperative within the adaptation process, that funding representatives maintained that it was a central criterion applied by an assessment panel:

*"they will always come together if there are key methodological flaws ... that will come out very quickly and that includes things like the PPI involvement is simply not there, and that is something that they consider mission critical, and as I say." P004 Funder*

The practicalities of involving stakeholders was also noted as problematic. This could be due to potential conflicts of interest between stakeholders and researchers. For example, stakeholders could direct adaptations in ways that are under-researched. One practitioner discussed their experiences of working in a setting in which they felt the evidence base did not work within the context creating a conflict between experience and evidence driven adaptations:

*"So although it's sitting there saying this is the evidence base, you should be doing this, it just categorically doesn't work in our setting. So that's an example of how if you just applied the evidence base it just, it would be hopeless." P022 Practitioner*

1  
2  
3 270 This causes a conflict between ensuring that all contributions are supported by evidence i.e. low risk of bias vs.  
4 271 changes being made based on stakeholder experience of the setting. This can cause issues when reviewers are  
5  
6 272 reviewing the study and assessing how the adaptations have been justified. For example, one journal editor  
7  
8 273 highlighted that many reviewers are not experts in adaptation and do not always assess the quality of PPI  
9 274 involvement:

10 275

11 276 *“, there’s a lot more need for PPI stuff, there’s a lot more need for doing more of the background work*  
12 277 *I’d say, the formative work to get input from key stakeholders and recipients... and that’s the kind of*  
13 278 *stuff that a lot of reviewers don’t even pick up or think about because they don’t do the work.” P003*  
14 279 *Journal editor*

15 280

16 281 In addition, many stakeholders were noted as making contributions at different times across the adaptation  
17 282 process, often with differing opinions and different expressions of need. This made it difficult to undertake  
18 283 adaptation systematically, incorporating and balancing the ‘stylistic differences’ across the stakeholders about  
19 284 what should be done:

20 285

21 286 *“But through just team discussion and supervision and peer supervision, we definitely have a kind of, if*  
22 287 *you like a general consensus that adaptations are necessary, and I think we all do that. But it’s just the*  
23 288 *degree to which we do it, and exactly how we do it will vary from clinician to clinician.” P022*  
24 289 *Practitioner*

25 290

26 291 Stakeholder involvement with adaptation, as described by all the participants, is key as they can provide insight  
27 292 into how the intervention might function in the new context and what adaptations the new context may require.  
28 293 However, it was noted that there are multiple perspectives and differences of opinion and values about what to  
29 294 adapt and why, which can pose barriers to effective adaptation.

30 295

### 31 296 **3.2 Selecting the intervention and negotiating the mismatch between the original and the new context**

32 297 Most data pertaining to participants’ experiences of intervention adaptation centred on how to select the right  
33 298 intervention for the new context, how to decide if adaptation is necessary and if so which adaptations to  
34 299 undertake. Overall, there was a sense of a tension between wanting to select the intervention based on evidence  
35 300 vs ensuring it could be delivered with the resources and money available. However, in reality there are  
36 301 competing practical factors that need to be taken into account to guide decisions. For example, one researcher  
37 302 reflected on the issue of balancing the evidence base versus the practical aspect of ensuring that the intervention  
38 303 could be delivered in a low-income country with different resources.

39 304

40 305 *“The most important thing I take first and foremost is the degree to which the evidence is available and*  
41 306 *is robust enough to adapt into different environments and whether it’s adaptable. Whether the rigour*  
42 307 *and the tool’s ability of the intervention may be suitable in high income and may not even be adaptable*  
43 308 *in low and middle income countries.” P023 researcher macro feasible*

44 309

45 310

1  
2  
3 310 Again, pragmatically, participants chose to use evidence-based interventions that were already embedded in the  
4 311 country as it had already achieved buy in amongst stakeholders and there were already the mechanisms in place  
5 312 to support delivery. Participants often selected interventions based on an awareness or prior relationships with  
6 313 the developers or evaluators as they had built a trusting and respectful working relationship:  
7  
8  
9 314

10 315 *“It is probably like most studies, I would love to say it was fully systematic! ... We chose it because*  
11 316 *they are very faith-based and we thought that would work but to be honest, a good bit of it was that*  
12 317 *these were two good investigators I knew.” P010 researcher micro in progress*  
13  
14 318

15  
16 319 When it came to the process of modifying the intervention, participants reflected on how time-consuming and  
17 320 therefore complex adaptation could be. Some maintained that it could take up to a year to iteratively adapt the  
18 321 intervention, depending on the level of complexity involved. There was a clear sense that the current funding  
19 322 climate, which often subsumed adaptation into early phases of evaluation, did not permit the required time to  
20 323 fully undertake comprehensive adaptation:  
21  
22 324

23  
24 325 *“it's very rare I guess, to get funding that is explicitly and exclusively for adapting a campaign. So that*  
25 326 *kind of funding mechanism is unusual, but it really gave us a chance to do things the right way.” P016*  
26 327 *researcher meso infeasible*  
27  
28 328

29  
30 329 In general, it was reported that there was a limited amount of time that could be funded to conduct the  
31 330 adaptation process. One funder commented that they only allow 6 months for this, which they felt was not  
32 331 sufficient time to conduct the adaptation process.  
33  
34 332

35  
36 333 *“I mean probably a limitation of the system is that we have kind of a rule in that we'll only fund up to*  
37 334 *six months of adaptation work.” P003 Funder*  
38  
39 335

40 336 Overall, the adaptation process is complex and involves balancing pragmatic decisions with decisions based on  
41 337 evidence, which researchers have been trained to prioritise. It requires time and a systematic approach to ensure  
42 338 a thorough process is undertaken, however, this is difficult if this process is not recognised by the funder and  
43 339 with no consistent and systematic approach to follow, at the time of data collection.  
44  
45 340

### 46 341 **3.3 Deciding upon the re-evaluation process**

47 342

48  
49 343 Some re-evaluation was considered by most to be necessary following the introduction of an adapted  
50 344 intervention into a new context, although deciding upon the nature and extent of new evaluation required was  
51 345 described as challenging. Participants discussed how they considered the utility of different study designs for re-  
52 346 evaluation and the complexity of deciding upon an approach. A number of individuals suggested that feasibility  
53 347 testing, process evaluations and implementation studies are most relevant, given that the most pertinent research  
54 348 questions relate to mechanism of action.  
55  
56 349  
57  
58  
59  
60

1  
2  
3 350 Despite some indication of the rationale for different evaluations designs, in practice participants encountered  
4 351 numerous challenges to the conduct of a scientifically robust evaluation. While it was common for participants  
5 352 to state a preference for less resource intensive evaluation, on occasion they did acknowledge the importance in  
6 353 resolving uncertainty. It appears that this can lead to researchers and funders being at odds as researchers feel  
7 354 they can borrow strength from the existing evidence and skip steps. Whereas, the funder default may be still to  
8 355 expect evaluation as if it is a new and untested intervention.  
9  
10  
11

12 356

13 357 *“It was forced upon us, I think it’d be true to say. [Laughs]. We’d decided, obviously, on an adaptation*  
14 358 *phase and, in fact, we wanted to go straight for a full trial. Because our views, you know, naivety*  
15 359 *galore, thought that this was a great programme from (name of place 3), and why not de-Anglify it,*  
16 360 *make some adaptations and pretty much roll straight out into full trial. Obviously, I think we probably*  
17 361 *had a feasibility, you know, internal pilot, I can’t quite remember, actually, at our Stage 1 application.*  
18 362 *And they came back, saying, “No, no, we don’t think you should go beyond feasibility phase.”” P014*  
19 363 *researcher micro in progress*  
20  
21  
22

23 364

24 365 Centrally, participants reflected on the resource required for extensive re-evaluation, notably in terms of time  
25 366 and funding, which could not always be acquired:  
26  
27

28 367

29 368 *“We need theory building and we need that work, but I feel like with the limited funding that’s*  
30 369 *available, particularly in the (name of place 1) and the drastic health conditions that we have, that we*  
31 370 *probably should start matching and integrating our efficacy trials with our effectiveness trials, that we*  
32 371 *develop things with an eye for sustainability and thinking about how to leverage the current resources*  
33 372 *that we have..” P008 researcher micro in progress*  
34  
35

36 373

37 374 There are clear challenges to re-evaluation which derive from a lack of certainty about how researchers make  
38 375 decisions about what type of evaluation to undertake and how funders make judgements about what to fund.  
39 376 There are merits to the different research designs however participants did not know which design was most  
40 377 suitable for their intervention and context and, at the time of data collection, there was no recommended  
41 378 systematic approach for how to make decisions about re-evaluating adapted interventions to utilise. Therefore,  
42 379 these findings identified a real need for guidance to inform the current uncertainty surrounding funding  
43 380 decisions and resources.  
44  
45

46 381

### 47 382 **3.4 Participants’ experiences of using adaptation frameworks and recommendations for future** 48 383 **guidance**

49 384 Participants described limited awareness of adaptation frameworks, rarely mentioning their uptake. However,  
50 385 when mentioned they were seen as important to conduct research in a systematic manner. In the absence of  
51 386 dedicated adaptation models, most participants drew upon generic intervention development and evaluation  
52 387 guidance to support their decision-making processes. There were recognised limitations with existing adaptation  
53 388 frameworks and guidance. First, they were considered too long and time consuming to be realistically applied  
54 389 given the resource constraints associated with the current funding climate. One participant followed the Map of  
55  
56  
57  
58  
59  
60

1  
2  
3 390 the Adaptation Process<sup>11</sup>, which was deemed to be shorter compared to other frameworks, due to time  
4 391 constraints.

5 392  
6 393 *“Yes, so I... we followed the Map of the Adaptation Process, right, that is more, it's a shorter version,*  
7 394 *and it's still grounded in theoretical approaches.... Time was one of the factors, being cost effective*  
8 395 *was another, and we didn't have enough funding for a thorough and long adaptation process.” P012*  
9 396 *researcher meso feasible*

10  
11  
12  
13  
14 397 Second, participants suggested that guidance can often be too conceptual, making it difficult to implement in  
15 398 real world practice. In particular there was a challenge in applying and tailoring generic, abstract thinking to  
16 399 the detailed specifics of the intervention they were working with:

17  
18  
19 400 *“It's so specific to each intervention, these things are so specific that it's really hard to pin them*  
20 401 *down, and to say well, to move from the concept to the actual practical side of things is quite*  
21 402 *difficult. I think that's probably the biggest challenge.” P005 researcher meso unfeasible*

22  
23  
24 403 Reflecting on these issues, participants expressed a number of recommendations for the development or future  
25 404 refinement of adaptation guidance. Some participants expressed a need for an overarching, systematic timeline  
26 405 of adaptation phases and re-evaluation approaches to allow for a common understanding across stakeholders of  
27 406 the adaptation and re-evaluation process.:

28  
29  
30  
31 407 *“I think it's always good to have a systematic kind of timeline in terms of when you should do stuff.”*  
32 408 *P019 researcher meso in progress*

33 409  
34  
35 410 In order to fully recognise the value of stakeholder involvement, participants stated that guidance also needed to  
36 411 target the full range of relevant stakeholders This can enhance buy in, by ensuring that the guidance can be  
37 412 understood by different stakeholders and providing a process for how to involve them throughout the study:

38  
39  
40 413  
41 414 *“....adaptation requires time and results and skills, and policymakers don't know that (laughs) at all. I*  
42 415 *think it's important to just have some guidelines or tools to let them understand, because I'd rather that*  
43 416 *it's one of your targets, but I think that's also the information you should give that's different for*  
44 417 *policymakers or practitioners or researchers.” P017 researcher meso effective*

45  
46  
47 418  
48 419 Finally, there was suggestion for a checklist in terms of what to include when reporting adaptation processes in  
49 420 papers for publication. Participants talked about multiple influences in terms of publications such<sup>26</sup>h as the time  
50 421 the researcher has, the type of paper that gets published and the need to accurately report the adaptation process.

51  
52  
53 422  
54 423 *“So having like a very big and broad checklist of things to think about, and probably will be something*  
55 424 *that you have nothing to do with you, but at least you can follow that one, like a third guideline to see*  
56 425 *what other things that you need to report.” P001 researcher micro feasible*

57  
58  
59 426 This will aid publication of adaptation process papers as well as outcome papers.



### 3.0 Discussion

This qualitative study explored the real-world experiences of researchers, practitioners, funders and journal editors of conducting adaptation research. This work has highlighted a number of key challenges; 1) involving stakeholders throughout the adaptation process and how to integrate the evidence base with experience; 2) selecting the intervention and negotiating any incongruence between the original intervention and the new context; 3) the complexity and uncertainty of deciding upon the re-evaluation process; and (4) participants' experiences of using adaptation frameworks in practice. These findings contributed to the ADAPT guidance<sup>12</sup> and address important gaps in our knowledge about the adaptation, implementation and re-evaluation of complex interventions in new contexts.

The participants repeatedly highlighted the importance of stakeholder involvement throughout the adaptation and re-evaluation process<sup>14 17</sup> as they provided an insight into the intervention's functioning or the features of the new context. However, there are challenges in co-production research<sup>18</sup>, as raised by the participants, in terms of ensuring adaptation is conducted in a systematic and evidence-based manner. This uncertainty is echoed in the work of community-based participatory research in which it is challenging to anchor it in comprehensive theoretical framework<sup>27</sup>. Due to the importance of stakeholders, the participants stressed the need for the guidance to be accessible and presented in a way that helps to involve stakeholders.

Selecting the intervention and negotiating the mismatch between the original and the new context presented challenges for the participants. They reflected that the selection process was complicated as researchers wanted to base their decisions on the current evidence base, however, they also acknowledged that there were practical considerations that could compete with the evidence base or override it. For example, after reviewing all the evidence on an intervention, one might find that the evidence indicates a particular intervention is the most effective. However, it may be too resource intensive to be implemented within the new context<sup>28</sup>. Therefore, pragmatically it might be best to select an intervention that is already embedded in the country as it already has the mechanisms in place to support delivery and in addition has gained the buy in of stakeholders<sup>29</sup>. This balance between evidence and practice-based decisions is a consistent challenge throughout public health research and is an aspect that needs to be resolved to help bridge the gap between research and practice<sup>30-32</sup>. This is an unresolved area which, if left unaddressed, could impact the scientific merit of the selected intervention<sup>32</sup>. Therefore, guidance is needed to clarify the intervention selection process and bridge the research and practice gap.

Participants reported the re-evaluation process and the merits of different research designs. Overall, it was found that there is currently much uncertainty as to which design to choose. Researchers reported deciding that more extensive adaptation required a RCT (it was acknowledged that this design might not always be appropriate to assess the intervention e.g a policy intervention at a macro level) to be conducted as there was greater uncertainty as to whether the intervention would remain effective. They also indicated that if the original intervention has had multiple RCTs already conducted showing effectiveness in the original context, they perceived that no pilot would be required during reevaluation<sup>26 33</sup>. However, funders have recommended to researchers that pilot studies should be conducted as an initial re-evaluation stage<sup>34 35</sup>. Participants felt that there

1  
2  
3 467 was a tension between these time requirements and the funding climate, at the time of data collection, which did  
4 468 not accommodate the required time to fully undertake comprehensive adaptation. Given the current funding  
5 469 climate and time to test feasibility and effectiveness, participants expressed a need for less resource intensive  
6 470 evaluation<sup>34</sup>. To address this issue in part it is important to place value on the information already existing for  
7 471 the intervention in its original context. This can aid decisions on whether a full evaluation is warranted prior to  
8 472 implementation<sup>36</sup>.

9 473  
10 474 Overall participants reflected that there were several challenges of using adaptation frameworks in practice. A  
11 475 number of adaptation frameworks have been developed in order to provide some guidance for this emerging  
12 476 field. However, while some aspects of good practice are clear, there are still areas on which there is no  
13 477 consensus on best practice<sup>2</sup>. Some frameworks were reported to be difficult to implement within real world  
14 478 settings due to the oversimplified, list-like format which does not reflect the complex nature of the adaptation  
15 479 process<sup>37</sup>. Further to this it was reported some frameworks were too time consuming, leading to interpretation  
16 480 issues due to funding restrictions. Participants expressed a desire for guidance to take into account real world  
17 481 challenges and for it to reflect the different time and funding availability.

18 482  
19 483 There are practical challenges that have been raised by the participants within this study. This area is constantly  
20 484 progressing with emerging adaptation frameworks<sup>1 2 13 14</sup> and now with the recently published ADAPT guidance  
21 485 there is a need to assess how such guidance can help support these identified practical challenges going forward.  
22 486 As highlighted by the participants, there are limited resources and funding available, as well as a drive towards  
23 487 value for money. Therefore, adaptation can provide a cost-effective way of tackling the health needs of different  
24 488 settings<sup>11</sup>, with the right support and buy-in from funding organisations. Overall, there was a clearly expressed  
25 489 need for guidance from study participants. However, in this quickly evolving field, it is important to engage  
26 490 with how the guidance is being used and the nuance and diversity in perspectives on an ongoing basis.

27 491

### 28 492 **3.1 Study Strengths and Limitations**

29 493 The primary limitation of this study was that the diversity of perspectives reflected in our data was limited by  
30 494 failure to recruit from some target groups. Although there were multiple attempts to recruit PPI and policy  
31 495 makers, we were unsuccessful., therefore in the process of developing case studies. We suspect that this issue  
32 496 with recruitment was due to the majority of the studies being completed, therefore, many of those involved in  
33 497 the study had moved onto other job so were uncontactable or did not have the time to take part. This is reflective  
34 498 of the nature of research culture in which people are contracted only for the duration of the project. We were  
35 499 unable to recruit policymakers after reaching out to a number of contacts due to the busy nature of their jobs.  
36 500 As such their perspective, which may contrast with the generated data, were not included. In addition, without  
37 501 the input from policymakers the study lacks insight into how intervention adaptation is commissioned and  
38 502 resourced at a national and local level. Furthermore, while we aimed to sample people involved in a wide range  
39 503 of interventions, operating across the micro, meso, and macro domains, we were only able to identify two  
40 504 macro-level interventions meeting our criteria for adaptation<sup>20</sup>. This may be a consequence of such  
41 505 interventions, notably national policies, not being explicitly framed as adaptations even when derived from  
42 506 principles and practices that are implemented elsewhere. Regardless of these limitations, the data did capture a

1  
2  
3 507 diverse and nuanced range of perspectives in relation to intervention adaptation. It provided complementary data  
4 508 that contributed to and triangulated with the other ADAPT work packages and facilitated the production of  
5 509 comprehensive guidance for researchers on adaptation<sup>38</sup>.

### 8 510 **3.2 Practice implications**

9  
10 511 As a result of this study there are a number of recommendations for conducting adaptation research. Participants  
11 512 identified that a systematic approach to adaptation and a checklist for publication was vital to ensure the  
12 513 intervention and its interaction with the context are adequately considered, while directing available resources to  
13 514 the most important areas of uncertainty, and that all pro-active and responsive adaptations are captured and  
14 515 justified both pre and post adaptation (researcher or practitioner led)<sup>39-41</sup>. However, as this is a new and  
15 516 developing field, there is also a need for flexibility to allow for innovation within the field. It is also important  
16 517 for the adaptation process to be accessible and work for different stakeholders to ensure their involvement  
17 518 throughout.

18 519

### 20 520 **3.3 Conclusions**

21 521 This study highlights the range of challenges experienced in funding, conducting and reporting research on  
22 522 intervention adaptation. This is partly due to uncertainty about the processes that should be undertaken, and the  
23 523 fact that, at the time of study conduct, frameworks to support adaptation have only recently emerged. Moving  
24 524 forward, guidance on intervention adaptation, including the ADAPT guidance, may be helpful in systematising  
25 525 processes provided that they remain responsive to the local contexts. Therefore, there is a need to assess if the  
26 526 current ADAPT guidance, whose development was informed by the results of this study and published after data  
27 527 collection and analysis for this study took place, can provide clarity. There is also a need to assess and ensure  
28 528 that this guidance is not being too reductionist, as this is an emerging area which requires room to grow<sup>41</sup>.  
29 529 Future research to monitor how adaptation research evolves, particularly as the ADAPT guidance begins to be  
30 530 used in real world practice, would improve knowledge and understanding. This learning will help to support  
31 531 further development and refinement of the guidance, ensuring that future iterations are responsive to the  
32 532 everchanging context of evaluation research.

33 533

34 534 **Data availability:** No additional data available

35 535

36 536 **Funding statement:** The ADAPT Study was funded by the MRC-NIHR Methodology Research Programme  
37 537 [MR/R013357/1]. The project was undertaken with the support of The Centre for the Development and  
38 538 Evaluation of Complex Interventions for Public Health Improvement (DECIPHer), a UKCRC Public Health  
39 539 Research Centre of Excellence. Joint funding (MR/KO232331/1) from the British Heart Foundation, Cancer  
40 540 Research UK, Economic and Social Research Council, Medical Research Council, the Welsh Government, and  
41 541 the Wellcome Trust, under the auspices of the UK Clinical Research Collaboration, is gratefully acknowledged.  
42 542 The study was also supported by its successor, the Centre for Development, Evaluation, Complexity and  
43 543 Implementation in Public Health improvement, funded by Health and Care Research Wales from 2020. Peter  
44 544 Craig and Mhairi Campbell receive funding from the UK Medical Research Council (MC\_UU\_12017-13) and  
45 545 the Scottish Government Chief Scientist Office (SPHSU13).

1  
2  
3 546  
4 547  
5  
6 548  
7  
8 549  
9 550  
10 551  
11 552  
12  
13 553  
14 554  
15 555  
16  
17 556  
18 557  
19 558  
20 559  
21 560  
22 561  
23 562  
24 563  
25 564  
26 565  
27 566  
28 567  
29  
30  
31  
32  
33  
34  
35  
36  
37  
38  
39  
40  
41  
42  
43  
44  
45  
46  
47  
48  
49  
50  
51  
52  
53  
54  
55  
56  
57  
58  
59  
60

### **Competing interests**

All authors have completed the ICMJE disclosure form (available on request from the corresponding author) and declare the funding as described above to support the work. The authors declare no financial relationships with any organisations that might have an interest in the submitted work in the previous three years, and no other relationships or activities that could appear to have influenced the submitted work.

**Author Contributions:** GM, PH, SM, and JS: Conceptualisation, funding acquisition, and writing- review & editing

RE: Conceptualisation, funding acquisition, formal analysis, methodology, project administration, supervision, visualization, writing-original draft preparation and writing-review & editing.

LC: Data curation, formal analysis, project administration, visualization, writing-original draft preparation and writing-review & editing.

HL: Conceptualisation, funding acquisition, data curation, formal analysis, and writing-review & editing

DC: Data curation, formal analysis, and writing-review & editing.

### **Statement of independence of researchers from funders**

The funders had no role in the conduct of the research or publication of its findings.

## References

1. Escoffery C, Lebow-Skelley E, Haardoerfer R, et al. A systematic review of adaptations of evidence-based public health interventions globally. *Implementation Science* 2018;13(1):125.
2. Movsisyan A, Arnold L, Evans R, et al. Adapting evidence-informed complex population health interventions for new contexts: a systematic review of guidance. *Implementation Science* 2019;14(1):105.
3. Howarth E, Devers K, Moore G, et al. Contextual issues and qualitative research. Challenges, solutions and future directions in the evaluation of service innovations in health care and public health: NIHR Journals Library 2016.
4. Craig P, Di Ruggiero E, Frolich KL, et al. Taking account of context in population health intervention research: guidance for producers, users and funders of research. 2018
5. Pfadenhauer LM, Gerhardus A, Mozygemba K, et al. Making sense of complexity in context and implementation: the Context and Implementation of Complex Interventions (CICI) framework. *Implementation science* 2017;12(1):21.
6. Pfadenhauer LM, Mozygemba K, Gerhardus A, et al. Context and implementation: a concept analysis towards conceptual maturity. *Zeitschrift für Evidenz, Fortbildung und Qualität im Gesundheitswesen* 2015;109(2):103-14.
7. Evans RE, Moore G, Movsisyan A, et al. How can we adapt complex population health interventions for new contexts? Progressing debates and research priorities. *J Epidemiol Community Health* 2020
8. Evans RE, Craig P, Hoddinott P, et al. When and how do ‘effective’ interventions need to be adapted and/or re-evaluated in new contexts? The need for guidance: BMJ Publishing Group Ltd, 2019.
9. Hawe P, Bond L, Butler H. Knowledge theories can inform evaluation practice: what can a complexity lens add? *New Directions for Evaluation* 2009;2009(124):89-100.
10. Cambon L, Minary L, Ridde V, et al. Transferability of interventions in health education: a review. *BMC public health* 2012;12(1):497.
11. McKleroy VS, Galbraith JS, Cummings B, et al. Adapting evidence-based behavioral interventions for new settings and target populations. *AIDS Education & Prevention* 2006;18(supp):59-73.
12. Moore G, Campbell M, Copeland L, et al. Adapting interventions to new contexts—the ADAPT guidance. *bmj* 2021;374
13. Stirman SW, Miller CJ, Toder K, et al. Development of a framework and coding system for modifications and adaptations of evidence-based interventions. *Implementation Science* 2013;8(1):65.
14. Kirk MA, Moore JE, Stirman SW, et al. Towards a comprehensive model for understanding adaptations’ impact: the model for adaptation design and impact (MADI). *Implementation Science* 2020;15(1):1-15.
15. Miller CJ, Barnett ML, Baumann AA, et al. The FRAME-IS: a framework for documenting modifications to implementation strategies in healthcare. *Implementation Science* 2021;16(1):1-12.
16. Leijten P, Melendez-Torres G, Knerr W, et al. Transported versus homegrown parenting interventions for reducing disruptive child behavior: A multilevel meta-regression study. *Journal of the American Academy of Child & Adolescent Psychiatry* 2016;55(7):610-17.
17. Hawkins J, Madden K, Fletcher A, et al. Development of a framework for the co-production and prototyping of public health interventions. *BMC Public Health* 2017;17(1):1-11.

- 1  
2  
3 617 18. Oliver K, Kothari A, Mays N. The dark side of coproduction: do the costs outweigh the  
4 618 benefits for health research? *Health Research Policy and Systems* 2019;17(1):1-10.
- 5 619 19. Yoong SL, Bolsewicz K, Grady A, et al. Adaptation of public health initiatives: expert  
6 620 views on current guidance and opportunities to advance their application and benefit.  
7 621 *Health Education Research* 2020;35(4):243-57.
- 8 622 20. Movsisyan A, Arnold L, Copeland L, et al. Adapting evidence-informed population health  
9 623 interventions for new contexts: a scoping review of current practice. *Health research  
10 624 policy and systems* 2021;19(1):1-19.
- 11 625 21. Campbell M, Moore G, Evans RE, et al. ADAPT study: adaptation of evidence-informed  
12 626 complex population health interventions for implementation and/or re-evaluation in  
13 627 new contexts: protocol for a Delphi consensus exercise to develop guidance. *BMJ open*  
14 628 2020;10(7):e038965.
- 15 629 22. Boblin SL, Ireland S, Kirkpatrick H, et al. Using Stake's Qualitative Case Study Approach  
16 630 to Explore Implementation of Evidence-Based Practice. *Qualitative Health Research*  
17 631 2013;23(9):1267-75. doi: 10.1177/1049732313502128
- 18 632 23. Crowe S, Cresswell K, Robertson A, et al. The case study approach. *BMC medical research  
19 633 methodology* 2011;11:100-00. doi: 10.1186/1471-2288-11-100
- 20 634 24. Yin RK. Enhancing the quality of case studies in health services research. *Health services  
21 635 research* 1999;34(5 Pt 2):1209-24.
- 22 636 25. Gale NK, Heath G, Cameron E, et al. Using the framework method for the analysis of  
23 637 qualitative data in multi-disciplinary health research. *BMC medical research  
24 638 methodology* 2013;13(1):1-8.
- 25 639 26. Aarons GA, Sklar M, Mustanski B, et al. "Scaling-out" evidence-based interventions to  
26 640 new populations or new health care delivery systems. *Implementation Science*  
27 641 2017;12(1):111.
- 28 642 27. Tremblay M-C, Martin DH, McComber AM, et al. Understanding community-based  
29 643 participatory research through a social movement framework: a case study of the  
30 644 Kahnawake Schools Diabetes Prevention Project. *BMC public Health* 2018;18(1):487.
- 31 645 28. Glasgow RE, Vogt TM, Boles SM. Evaluating the public health impact of health promotion  
32 646 interventions: the RE-AIM framework. *American journal of public health*  
33 647 1999;89(9):1322-27.
- 34 648 29. Löfholm CA, Brännström L, Olsson M, et al. Treatment - as - usual in effectiveness  
35 649 studies: What is it and does it matter? *International journal of social Welfare*  
36 650 2013;22(1):25-34.
- 37 651 30. Howard MO, McMillen CJ, Pollio DE. Teaching evidence-based practice: Toward a new  
38 652 paradigm for social work education. *Research on Social Work Practice*  
39 653 2003;13(2):234-59.
- 40 654 31. Regehr C, Stern S, Shlonsky A. Operationalizing evidence-based practice: The  
41 655 development of an institute for evidence-based social work. *Research on Social Work  
42 656 Practice* 2007;17(3):408-16.
- 43 657 32. Marsiglia FF, Booth JM. Cultural adaptation of interventions in real practice settings.  
44 658 *Research on social work practice* 2015;25(4):423-32.
- 45 659 33. Bonell C, Prost A, Melendez-Torres G, et al. Will it work here? A realist approach to local  
46 660 decisions about implementing interventions evaluated as effective elsewhere. *J  
47 661 Epidemiol Community Health* 2021;75(1):46-50.
- 48 662 34. Fenwick E, Steuten L, Knies S, et al. Value of information analysis for research decisions—  
49 663 an introduction: report 1 of the ISPOR Value of Information Analysis Emerging Good  
50 664 Practices Task Force. *Value in health* 2020;23(2):139-50.

- 1  
2  
3 665 35. Eldridge SM, Lancaster GA, Campbell MJ, et al. Defining feasibility and pilot studies in  
4 666 preparation for randomised controlled trials: development of a conceptual framework.  
5 667 *PloS one* 2016;11(3):e0150205.  
6  
7 668 36. Tuffaha HW, Roberts S, Chaboyer W, et al. Cost-effectiveness and value of information  
8 669 analysis of nutritional support for preventing pressure ulcers in high-risk patients:  
9 670 implement now, research later. *Applied health economics and health policy*  
10 671 2015;13(2):167-79.  
11 672 37. Chu J, Leino A. Advancement in the maturing science of cultural adaptations of evidence-  
12 673 based interventions. *Journal of Consulting and Clinical Psychology* 2017;85(1):45.  
13 674 38. Moore G, Campbell, M., Copeland, L., Craig, P., Movsisyan, A., Hoddinott, P., Littlecott,  
14 675 H., O’Cathain, A., Pfadenhauer, L., Rehfuess, E., Segrott, J., Hawe,P., Kee, F.,  
15 676 Couturiaux, D., Hallingberg, B., Evans, R. Adaptation of interventions for  
16 677 implementation and/or re-evaluation in new contexts: The ADAPT guidance (v1.0).  
17 678 2020. (accessed 15.4.21).  
18 679 39. Barrera Jr M, Castro FG, Strycker LA, et al. Cultural adaptations of behavioral health  
20 680 interventions: a progress report. *Journal of consulting and clinical psychology*  
21 681 2013;81(2):196.  
22 682 40. Richard L, Torres S, Tremblay M-C, et al. An analysis of the adaptability of a professional  
23 683 development program in public health: results from the ALPS Study. *BMC Health*  
24 684 *Services Research* 2015;15(1):1-13.  
25 685 41. Rabin BA, McCreight M, Battaglia C, et al. Systematic, multimethod assessment of  
26 686 adaptations across four diverse health systems interventions. *Frontiers in public health*  
27 687 2018;6:102.  
28  
29 688  
30  
31  
32  
33  
34  
35  
36  
37  
38  
39  
40  
41  
42  
43  
44  
45  
46  
47  
48  
49  
50  
51  
52  
53  
54  
55  
56  
57  
58  
59  
60

## Appendix A

**The Adapt Study:  
Development of guidance for funders, researchers, policy-makers and  
practitioners**

**Interview Schedule: Researchers**

**1. Recording**

1. Check with the participant that you can record the interview and switch on the recorder

*N.B. For telephone interviews it is important that the recorder is switched on before consent is taken to ensure that we have a record of consent.*

*Ensure that they have received the paper copy of the consent form.*

**2. Consent**

1. Ensure the participant has received and read the information sheet.
2. Ensure the participant has the opportunity to answer any questions they have about the study.
3. Take the participant through the consent form and explain each item. Ask the participant to initial each item and sign the form.
4. Counter-sign the consent form.

**3. Context of Study**



1. Introduce the study. Depending on the professional identity of the participant different levels of explanation will be required on what is adaptation.
2. Prior to the interview select compile an overview of the intervention:
  - i. Outcomes; type; target population; activities; theory of change; implementation.
  - ii. The context in which the intervention was originally developed/evaluated.
  - iii. Evaluation in the original context.
  - iv. The context the intervention was adapted to and/or re-evaluated in
  - v. Adaptation and evaluation in the new context(s).

#### 4. Questions

##### Code

1. Domain of question
  - i. Question to ask participant
    1. *Prompts / follow-up questions*
  
1. Participant Details
  - i. Can you tell me about yourself?
    1. *Current role? Previous roles? Interest in this area?*
  
2. What is adaptation?

Our study is considering how best to adapt or change an intervention so that in can be used in a new context, for example a different country or

1  
2  
3 with a different group of people. It might include adapting intervention  
4 components, implementation or the context.

- 5 i. What does the term adaptation mean to you?  
6  
7 ii. Why do you think intervention adaptations are undertaken?  
8  
9 iii. What, if anything, do you think might need to be adapted for an  
10 intervention to be used in a new context? What, if anything, do you  
11 think should stay the same?  
12  
13 iv. Are there any other terms you might use when thinking about  
14 'adaptation'? Can you describe them?  
15

16  
17 2. Confirm our Knowledge of Intervention.

18 We are now going to talk about the intervention you were involved in  
19 adapting and / or re-evaluating in a new context (*NB. Participants might*  
20 *not use the term context. They might refer to country, setting etc. Use this*  
21 *terminology as context may seem abstract*).  
22

23  
24 *Summarise what we know about the intervention from the publications etc*  
25 *and confirm if this is broadly correct and if the participant has any*  
26 *additional information or corrections.*  
27  
28

29  
30 3. Deciding on Adaptation

- 31 i. What was your involvement with the intervention?  
32  
33 ii. Why was this specific intervention chosen to deliver in the new  
34 context?  
35 1. *Feasible, acceptable, similarity of contexts?*  
36  
37 iii. Was there any flexibility / adaptability built into the original  
38 intervention? If so, what was it and why? If not, why not?  
39 1. *What does fidelity look like in the original form of the*  
40 *intervention?*  
41  
42 iv. Can you summarise the additional changes, if any, you made to the  
43 intervention so that it could be delivered in the new context?  
44  
45 v. How did you decide on what would be changed and what would  
46 stay the same?  
47 1. *Who decided?*  
48 2. *Was there consensus or disagreement? How was this*  
49 *resolved?*  
50  
51 vi. Did you undertake any other changes that weren't directly  
52 related to the intervention? For example did you make any  
53 changes to the setting/context? (*Explore changes beyond*  
54 *intervention components and discuss contextual changes if*  
55 *mentioned. Question will need to be amended according to how*  
56 *participant discusses context* )  
57  
58  
59  
60

- 1  
2  
3 vii. Were there any changes that you planned to undertake and did not  
4 in practice?  
5  
6 viii. Were there any changes that you did not plan for but happened in  
7 practice?  
8  
9

10 4. Process for Undertaking Adaptations

11 I understand that you undertook the following steps when adapting the  
12 intervention so that it could be delivered in the new context (outline  
13 process from study reports). Is this correct? Is there anything we have  
14 missed out?  
15

- 16 i. How did you decide on this process?  
17 1. *Who decided?*  
18 2. *Was there consensus or disagreement? How was this*  
19 *resolved?*  
20  
21 ii. Was any guidance used to inform this decision-making?  
22 1. *Which ones? How were they used? What are your reflections*  
23 *on them?*  
24  
25 iii. Were there any differences between the process you intended to  
26 follow and the actual processes undertaken? If so, why?  
27  
28  
29

30 5. Deciding on re-evaluation (*Wording and focus modified to evaluation that*  
31 *has been conducted*)

32 I understand that the intervention was re-evaluated in the new context  
33 via a pilot trial/RCT/process evaluation etc. and was found to be  
34 effective/ineffective/feasible etc. Is this correct?  
35

- 36 i. How did you decide upon the particular approach to re-  
37 evaluation?  
38 1. *Who decided?*  
39 2. *Was there consensus or disagreement? How was this*  
40 *resolved?*  
41  
42 ii. Was any guidance use when deciding on the re-evaluation study  
43 design?  
44 2. *Which ones? How were they used? What are your reflections*  
45 *on them?*  
46  
47 iii. In practice were there any differences between the intended  
48 approach to re-evaluation and actual re-evaluation undertaken?  
49 If so, why?  
50  
51 iv. How would you explain the outcome of the evaluation?  
52 a. *Differences in study design?*  
53 b. *Contexts similar/dissimilar?*  
54 c. *Intervention suitable/unsuitable?*  
55  
56  
57  
58

59 6. Overall reflection on adaptation and re-evaluation  
60

- 1  
2  
3 i. What advice would you give to a researcher who was starting out  
4 with a similar study to the one you described today?  
5  
6 1. *What, if anything, was particularly helpful about the way you*  
7 *approached the adaptation and re-evaluation?*  
8  
9 2. *What, if anything, was particularly unhelpful? What would*  
10 *you do differently in future?*  
11

12  
13 7. Reporting of adaptation

- 14 i. How was it decided how and where to report the intervention  
15 adaptation and evaluation findings?  
16  
17 1. *Who decided?*  
18  
19 2. *Was there consensus or disagreement? How was this*  
20 *resolved?*  
21 ii. What influenced this decision (e.g. worked examples, guidance)?  
22

23  
24 8. Adaptation guidance

- 25 i. What are your views on having guidance to support  
26 researchers/policy-makers/practitioners in undertaking  
27 adaptation and/or re-evaluation?  
28  
29 ii. What would useful guidance on intervention adaptation and/or re-  
30 evaluation look like to you?  
31

32  
33 9. **Closure and Dissemination**

- 34 • Thank the participant for their time.  
35  
36 • Explain what will happen with their data next (i.e. will be transferred to  
37 secure network server and anonymised)  
38  
39 • Explain what will happen next in the study (i.e. DELPHI study). Ask if we  
40 can retain their details to make future contact to potentially invite them  
41 to participate in the study. Emphasise that their name will be added to the  
42 list as a relevant stakeholder in the field and not because they have  
43 participated in the qualitative study – the interviewer will anonymise the  
44 data so the participant is not known to the rest of the study team.  
45  
46 • Ask if we can retain their details to make future contact in regard to  
47 dissemination (e.g. email list to circulate issued guidance)  
48  
49  
50  
51  
52  
53  
54  
55  
56  
57  
58  
59  
60

1  
2  
3  
4  
5  
6  
7  
8  
9

## **The Adapt Study: Development of guidance for funders, researchers, policy-makers and practitioners**

10  
11  
12  
13  
14  
15  
16  
17  
18  
19  
20  
21  
22  
23  
24  
25  
26  
27  
28  
29  
30  
31  
32  
33  
34  
35  
36  
37

### **Interview Schedule: Journal Editors / Reviewers**

38  
39  
40  
41  
42  
43  
44  
45  
46  
47  
48  
49  
50  
51  
52  
53  
54  
55  
56  
57  
58  
59  
60

#### **1. Recording**

0. Check with the participant that you can record the interview and switch on the recorder

#### **2. Consent**

0. Ensure the participant has received and read the information sheet.
1. Ensure the participant has the opportunity to answer any questions they have about the study.
2. Ensure the participant has received the consent form and returned a signed copy.
3. Counter-sign the consent form.

#### **3. Context of Study**

0. Introduce the study. Depending on the journal (e.g. generic public health or specialist implementation/adaptation) different levels of explanation will be required on what is adaptation.
1. Prior to the interview select a couple of examples of adaptation from the journal that you could discuss as concrete examples if required.

#### 4. Questions

##### Code

0. Domain of question
  - i. Question to ask participant
    0. Prompts / follow-up questions
1. Journal and Readership
  - i. Can you please tell me about your role at the journal?
  - ii. Can you tell me about the remit of the journal and its readership (e.g. discipline, methodological focus)?
    0. *How might its remit and readership compare with other journals within the discipline / other inter-disciplinary journals?*
    1. *Do you think studies reporting adaptations or re-evaluation is a priority for the journal? Why / why not?*
2. Decision Making and Assessment Criteria
  - i. What is the general process for making decisions about what to publish in the journal (e.g. peer review, editorial recourse)?

- 1  
2  
3 ii. How do you make decisions about what to publish?  
4     *0. Is there generic assessment criteria?*  
5     *1. Is there specific assessment criteria by study design etc.?*  
6  
7 iii. Does the journal provide reporting/publishing guidance for  
8 authors? If so, could you summarize?  
9

10  
11 3. Interventions Reporting Adaptations and Re-evaluation

- 12 i. If possible, could you outline any key examples of studies  
13 published in the journal that report adaptations and/or re-  
14 evaluations in new contexts?  
15     *0. How is adaptation defined in these studies? What do you*  
16 *think about these definitions?*  
17     *1. What are the types of interventions and outcomes presented?*  
18     *2. What types adaptations are presented? (Adaptation to*  
19 *components, implementation and/or context)*  
20     *3. What methodologies were presented??*  
21     *4. If interventions were being re-evaluated in the new context,*  
22 *what approaches to re-evaluation were presented? How were*  
23 *these justified/explained?*  
24  
25 ii. Does the journal set any criteria or provide guidance on how to  
26 assess either the conduct or reporting of adaptations and/or re-  
27 evaluation?  
28     *0. If so how are these criteria/guidance used by reviewers / how*  
29 *do you use them?*  
30     *1. What are the strengths and limitations of these*  
31 *criteria/guidance?*  
32     *2. If there is no criteria/guidance how are decisions made about*  
33 *whether to publish an adaptation and/or re-evaluation*  
34 *study? (N.B. Earlier question on general decision-making, and*  
35 *this is checking more specifically about adaptation studies)*  
36  
37 iii. *Editors:* How would you describe the nature and quality of  
38 feedback that reviewers provide for adaption and/or re-evaluation  
39 studies?  
40     *0. Are these any common areas of consistency and*  
41 *disagreement?*  
42  
43 iv. Based on your experience of reviewing/publishing adaptation  
44 and/or re-evaluation studies are there key strengths you have  
45 observed across studies? (e.g. tend to be a comprehensive  
46 adaptation process)  
47  
48 v. Are there key limitations you have observed across studies? (e.g.  
49 poor description of rationale for adaptations)  
50  
51 vi. Are there key recommendations you have to strengthen studies  
52 that undertake adaptations and/or re-evaluation?  
53  
54  
55  
56  
57  
58  
59  
60

1  
2  
3  
4  
5  
6  
7  
8  
9  
10  
11  
12  
13

#### 4. Adaptation and Re-valuation Guidance

- i. Do you think guidance might support the process of deciding whether to publish adaptation and/or re-evaluation study? Why and how?
- ii. What would useful guidance on intervention adaptation and/or re-evaluation look like to you?

#### 5. Closure and Dissemination

0. Thank the participant for their time.
  1. Explain what will happen with their data next (i.e. will be transferred to secure network server and anonymised)
  2. Explain what will happen next in the study (i.e. DELPHI study). Ask if we can retain their details to make future contact to potentially invite them to participate in the study. Emphasise that their name will be added to the list as a relevant stakeholder in the field and not because they have participated in the qualitative study – the interviewer will anonymise the data so the participant is not known to the rest of the study team.
  3. Ask if we can retain their details to make future contact in regard to dissemination (e.g. email list to circulate issued guidance)
- 14  
15  
16  
17  
18  
19  
20  
21  
22  
23  
24  
25  
26  
27  
28  
29  
30  
31  
32  
33  
34  
35  
36  
37  
38  
39  
40  
41  
42  
43  
44  
45  
46  
47  
48  
49  
50  
51  
52  
53  
54  
55  
56  
57  
58  
59  
60



1  
2  
3  
4  
5  
6  
7  
8  
9  
10  
11  
12  
13  
14  
15  
16  
17  
18  
19  
20  
21  
22  
23  
24  
25  
26  
27  
28  
29  
30  
31  
32  
33  
34  
35  
36  
37  
38  
39  
40  
41  
42  
43  
44  
45  
46  
47  
48  
49  
50  
51  
52  
53  
54  
55  
56  
57  
58  
59  
60

## The Adapt Study: Development of guidance for funders, researchers, policy-makers and practitioners

### Interview Schedule: Funders

#### 1. Recording

1. Check with the participant that you can record the interview and switch on the recorder

*N.B. For telephone interviews it is important that the recorder is switched on before consent is taken to ensure that we have a record of consent. Ensure that they have received the paper copy of the consent form.*

#### 2. Consent

1. Ensure the participant has received and read the information sheet.
2. Ensure the participant has the opportunity to answer any questions he has about the study.
3. Take the participant through the consent form and explain each item. Ask the participant to initial each item and sign the form.
4. Counter-sign the consent form.

### 3. Questions

1. Can you please tell me about your role on the funding panel?
2. Funding Panel
  - i. Can you tell me about the remit of the funding panel (e.g. types of study, outcome focus)?
  - ii. Can you tell me about the membership of the funding panel (e.g. expertise)?
  - iii. How do you think the funding panel's remit and expertise fit with the wider funding context, both nationally and internationally?
3. Decision Making and Assessment Criteria
  - i. What is the process for making decisions on the panel?
    1. Prioritisation panel?
    2. Scientific panel?
  - ii. How do you make decisions about what to fund?
    1. Is there generic assessment criteria?
    2. Is there specific assessment criteria by study design etc.?
4. Interventions Proposing Adaptations and Re-evaluation

- 1
  - 2
  - 3
  - 4
  - 5
  - 6
  - 7
  - 8
  - 9
  - 10
  - 11
  - 12
  - 13
  - 14
  - 15
  - 16
  - 17
  - 18
  - 19
  - 20
  - 21
  - 22
  - 23
  - 24
  - 25
  - 26
  - 27
  - 28
  - 29
  - 30
  - 31
  - 32
  - 33
  - 34
  - 35
  - 36
  - 37
  - 38
  - 39
  - 40
  - 41
  - 42
  - 43
  - 44
  - 45
  - 46
  - 47
  - 48
  - 49
  - 50
  - 51
  - 52
  - 53
  - 54
  - 55
  - 56
  - 57
  - 58
  - 59
  - 60
- i. Does your panel have a working definition of adaptation? If so, what is it?
    1. Is there consensus/disagreement on the panel over what adaptation means?
    2. Do you use other terms to describe adaptation, and why?
  - ii. Does your panel set any criteria or provide guidance for applicants proposing to conduct adaptations (e.g. 6SQUiD for development)?
    1. If so how are these criteria/guidance used by applicants?
    2. How useful are these criteria/guidance to the funding panel?
  - iii. Can you tell me about your experience of funding studies that include proposed adaptations:
    1. What were the types, theories and outcomes of interventions proposed?
    2. What types of adaptations are proposed?
    3. What types of studies are proposed (e.g. development, outcome evaluation, and implementation)?
    4. How to studies define and analyse context?
    5. Do you have reflections on the strengths and limitations of proposed adaptations?
  - iv. How does the panel decide about the appropriateness of proposed adaptations?
    1. Are there key areas of consensus?
    2. Are there key areas of disagreement?
  - v. How does the panel decide about the appropriateness of proposed re-evaluation?
    1. Are there key areas of consensus?
    2. Are there key areas of disagreement?
  - vi. Are there ways in which you think proposed adaptations and / or re-evaluation studies could be strengthened?

## 5. Reporting of Adaptations in Proposals

- i. Does your panel set any criteria or provide guidance for applicants on the reporting and dissemination of adaptation studies?
  1. If so how are these criteria/guidance used by applicants?
  2. How useful are these criteria/guidance to the funding panel?

## 6. Adaptation and Re-valuation Guidance

- i. Do you think guidance might support the process of deciding when to fund an adaptation and/or re-evaluation study? Why and how?
- ii. What would useful guidance on intervention adaptation and/or re-evaluation look like to you?

#### 4. Closure and Dissemination

1. Thank the participant for their time.
2. Explain what will happen with their data next (i.e. will be transferred to secure network server and anonymised)
3. Explain what will happen next in the study (i.e. DELPHI study)
  - i. Check with the study team if we would like to invite this participant to complete the DELPHI, and if so ask if they would like to be contacted about participation.
4. Ask if we can retain their details to make future contact in regard to dissemination (e.g. email list to circulate issued guidance)

## Standards for Reporting Qualitative Research (SRQR)\*

<http://www.equator-network.org/reporting-guidelines/srqr/>

Page/line no(s).

### Title and abstract

|                                                                                                                                                                                                                                                              |   |
|--------------------------------------------------------------------------------------------------------------------------------------------------------------------------------------------------------------------------------------------------------------|---|
| <p><b>Title</b> - Concise description of the nature and topic of the study Identifying the study as qualitative or indicating the approach (e.g., ethnography, grounded theory) or data collection methods (e.g., interview, focus group) is recommended</p> | 1 |
| <p><b>Abstract</b> - Summary of key elements of the study using the abstract format of the intended publication; typically includes background, purpose, methods, results, and conclusions</p>                                                               | 2 |

### Introduction

|                                                                                                                                                                     |   |
|---------------------------------------------------------------------------------------------------------------------------------------------------------------------|---|
| <p><b>Problem formulation</b> - Description and significance of the problem/phenomenon studied; review of relevant theory and empirical work; problem statement</p> | 3 |
| <p><b>Purpose or research question</b> - Purpose of the study and specific objectives or questions</p>                                                              | 3 |

### Methods

|                                                                                                                                                                                                                                                                                                                                                                                                             |             |
|-------------------------------------------------------------------------------------------------------------------------------------------------------------------------------------------------------------------------------------------------------------------------------------------------------------------------------------------------------------------------------------------------------------|-------------|
| <p><b>Qualitative approach and research paradigm</b> - Qualitative approach (e.g., ethnography, grounded theory, case study, phenomenology, narrative research) and guiding theory if appropriate; identifying the research paradigm (e.g., postpositivist, constructivist/ interpretivist) is also recommended; rationale**</p>                                                                            | P 4 line120 |
| <p><b>Researcher characteristics and reflexivity</b> - Researchers' characteristics that may influence the research, including personal attributes, qualifications/experience, relationship with participants, assumptions, and/or presuppositions; potential or actual interaction between researchers' characteristics and the research questions, approach, methods, results, and/or transferability</p> | P5 line 179 |
| <p><b>Context</b> - Setting/site and salient contextual factors; rationale**</p>                                                                                                                                                                                                                                                                                                                            | P 3 and 4   |
| <p><b>Sampling strategy</b> - How and why research participants, documents, or events were selected; criteria for deciding when no further sampling was necessary (e.g., sampling saturation); rationale**</p>                                                                                                                                                                                              | P4 line 126 |
| <p><b>Ethical issues pertaining to human subjects</b> - Documentation of approval by an appropriate ethics review board and participant consent, or explanation for lack thereof; other confidentiality and data security issues</p>                                                                                                                                                                        | P4 line 118 |
| <p><b>Data collection methods</b> - Types of data collected; details of data collection procedures including (as appropriate) start and stop dates of data collection and analysis, iterative process, triangulation of sources/methods, and modification of procedures in response to evolving study findings; rationale**</p>                                                                             | P4 Line 150 |

|    |                                                                                         |             |
|----|-----------------------------------------------------------------------------------------|-------------|
| 1  |                                                                                         |             |
| 2  | <b>Data collection instruments and technologies</b> - Description of instruments (e.g., |             |
| 3  | interview guides, questionnaires) and devices (e.g., audio recorders) used for data     |             |
| 4  | collection; if/how the instrument(s) changed over the course of the study               | P4 Line 150 |
| 5  |                                                                                         |             |
| 6  | <b>Units of study</b> - Number and relevant characteristics of participants, documents, |             |
| 7  | or events included in the study; level of participation (could be reported in results)  | P4 line 140 |
| 8  |                                                                                         |             |
| 9  | <b>Data processing</b> - Methods for processing data prior to and during analysis,      |             |
| 10 | including transcription, data entry, data management and security, verification of      |             |
| 11 | data integrity, data coding, and anonymization/de-identification of excerpts            | P5 line 159 |
| 12 |                                                                                         |             |
| 13 | <b>Data analysis</b> - Process by which inferences, themes, etc., were identified and   |             |
| 14 | developed, including the researchers involved in data analysis; usually references a    |             |
| 15 | specific paradigm or approach; rationale**                                              | P5 line 159 |
| 16 |                                                                                         |             |
| 17 | <b>Techniques to enhance trustworthiness</b> - Techniques to enhance trustworthiness    |             |
| 18 | and credibility of data analysis (e.g., member checking, audit trail, triangulation);   |             |
| 19 | rationale**                                                                             | P5 Line 174 |
| 20 |                                                                                         |             |

### Results/findings

|    |                                                                                             |       |
|----|---------------------------------------------------------------------------------------------|-------|
| 21 |                                                                                             |       |
| 22 |                                                                                             |       |
| 23 | <b>Synthesis and interpretation</b> - Main findings (e.g., interpretations, inferences, and |       |
| 24 | themes); might include development of a theory or model, or integration with                |       |
| 25 | prior research or theory                                                                    | P8-13 |
| 26 |                                                                                             |       |
| 27 | <b>Links to empirical data</b> - Evidence (e.g., quotes, field notes, text excerpts,        |       |
| 28 | photographs) to substantiate analytic findings                                              | P8-13 |
| 29 |                                                                                             |       |

### Discussion

|    |                                                                                           |              |
|----|-------------------------------------------------------------------------------------------|--------------|
| 30 |                                                                                           |              |
| 31 |                                                                                           |              |
| 32 | <b>Integration with prior work, implications, transferability, and contribution(s) to</b> |              |
| 33 | <b>the field</b> - Short summary of main findings; explanation of how findings and        |              |
| 34 | conclusions connect to, support, elaborate on, or challenge conclusions of earlier        |              |
| 35 | scholarship; discussion of scope of application/generalizability; identification of       |              |
| 36 | unique contribution(s) to scholarship in a discipline or field                            | P13-14       |
| 37 |                                                                                           |              |
| 38 | <b>Limitations</b> - Trustworthiness and limitations of findings                          | P14 Line 461 |
| 39 |                                                                                           |              |

### Other

|    |                                                                                            |               |
|----|--------------------------------------------------------------------------------------------|---------------|
| 40 |                                                                                            |               |
| 41 |                                                                                            |               |
| 42 | <b>Conflicts of interest</b> - Potential sources of influence or perceived influence on    |               |
| 43 | study conduct and conclusions; how these were managed                                      | P 15 Line 500 |
| 44 |                                                                                            |               |
| 45 | <b>Funding</b> - Sources of funding and other support; role of funders in data collection, |               |
| 46 | interpretation, and reporting                                                              | P15 Line 488  |
| 47 |                                                                                            |               |

\*The authors created the SRQR by searching the literature to identify guidelines, reporting standards, and critical appraisal criteria for qualitative research; reviewing the reference lists of retrieved sources; and contacting experts to gain feedback. The SRQR aims to improve the transparency of all aspects of qualitative research by providing clear standards for reporting qualitative research.

1  
2  
3  
4  
5  
6  
7  
8  
9  
10  
11  
12  
13  
14  
15  
16  
17  
18  
19  
20  
21  
22  
23  
24  
25  
26  
27  
28  
29  
30  
31  
32  
33  
34  
35  
36  
37  
38  
39  
40  
41  
42  
43  
44  
45  
46  
47  
48  
49  
50  
51  
52  
53  
54  
55  
56  
57  
58  
59  
60

\*\*The rationale should briefly discuss the justification for choosing that theory, approach, method, or technique rather than other options available, the assumptions and limitations implicit in those choices, and how those choices influence study conclusions and transferability. As appropriate, the rationale for several items might be discussed together.

**Reference:**

O'Brien BC, Harris IB, Beckman TJ, Reed DA, Cook DA. **Standards for reporting qualitative research: a synthesis of recommendations.** *Academic Medicine*, Vol. 89, No. 9 / Sept 2014  
DOI: 10.1097/ACM.0000000000000388

For peer review only
